# Supplementary material for: Women’s Expectations of and Satisfaction with Antenatal Care Services in a Semi-Urban Setting in Tanzania and Associated Factors: A Cross-Sectional Survey
Source: MDPI journal article supplement (doi:10.3390/healthcare11162321), 2023-08-17
Supplement: s1 [file s1]

**Additional File S2: Satisfaction with Antenatal Care Items Scores Mean, Standard deviation and Median**

| <b>Satisfactions Scale</b>                                                                                       | <b>Mean</b> | <b>SD</b> | <b>Median</b> | <b>Subscale</b> |
|------------------------------------------------------------------------------------------------------------------|-------------|-----------|---------------|-----------------|
| I am satisfied with the explanation my provider gave to me of what was going to happen during my prenatal visits | 5.34        | 1.314     | 6             | Information     |
| I am satisfied with the explanation my provider gave to me about medical procedures                              | 5.51        | .990      | 6             |                 |
| I am satisfied with the information my provider gave to me about how things are going with my pregnancy          | 5.51        | 1.087     | 6             |                 |
| I am satisfied with the kinds of things my provider discussed during my prenatal visits                          | 5.11        | 1.469     | 6             |                 |
| I am satisfied with the explanation my provider gave to me about what I can expect about parenting a new- born   | 2.65        | 2.073     | 1             |                 |
| I am satisfied with the way my provider has prepared me for labour and delivery                                  | 3.16        | 2.237     | 2             |                 |
| I am satisfied with the way my provider treats me                                                                | 5.39        | .975      | 6             | Provider care   |
| I am satisfied with the respect that I am shown by my provider                                                   | 5.39        | 1.063     | 6             |                 |
| I am satisfied with the quality of care that I receive from my provider                                          | 5.40        | .945      | 6             |                 |
| I am satisfied with the way I am made to feel that I am not wasting my provider's time                           | 5.15        | 1.278     | 6             |                 |
| I am satisfied with being able to ask questions without embarrassment                                            | 5.05        | 1.421     | 6             |                 |
| I am satisfied with not having to repeat my story every time I come in for a visit                               | 4.70        | 1.566     | 5             |                 |
| I am satisfied with the way the staff expresses concern about my overall personal situation                      | 5.36        | 1.129     | 6             | Staff Interest  |
| I am satisfied with the time the staff spends talking about things of interest to me                             | 3.70        | 2.020     | 4             |                 |
| I am satisfied with the way the staff treats me                                                                  | 5.27        | 1.161     | 6             |                 |
| I am satisfied with the time the staff takes with me even though I do not have problems with this pregnancy      | 5.09        | 1.410     | 6             |                 |

|                                                                                                                   |      |       |   |                       |
|-------------------------------------------------------------------------------------------------------------------|------|-------|---|-----------------------|
| I am satisfied with the interest and concern the staff has shown me                                               | 5.08 | 1.318 | 6 | System characteristic |
| I am satisfied with the way the staff deals with all my medical problems                                          | 4.81 | 1.509 | 5 |                       |
| I am satisfied with the amount of time I wait to be seen by my provider                                           | 3.86 | 1.996 | 5 |                       |
| I am satisfied with the total amount of time I spend at the office/clinic                                         | 3.88 | 2.007 | 5 |                       |
| I am satisfied with the parking facilities of the office/clinic                                                   | 3.99 | 2.001 | 5 |                       |
| I am satisfied with the waiting room facilities of the office/clinic                                              | 3.67 | 2.163 | 4 |                       |
| I am satisfied with the examination room of the office/clinic                                                     | 3.74 | 2.170 | 5 |                       |
| I am satisfied with my ability to schedule prenatal visits at a time convenient for me                            | 2.37 | 1.846 | 1 |                       |
| I am satisfied with how easy it is to reschedule my prenatal visits                                               | 2.13 | 1.629 | 1 |                       |
| I am satisfied with how easy it was to get prenatal care early in my pregnancy (that is, before the fourth month) | 5.49 | 1.236 | 6 |                       |
| I am satisfied with having all the recommended tests                                                              | 3.54 | 2.125 | 4 |                       |
| I am satisfied with the number of prenatal visits I made until now                                                | 5.40 | 1.066 | 6 |                       |
