# Supplementary material for: Women’s Expectations of and Satisfaction with Antenatal Care Services in a Semi-Urban Setting in Tanzania and Associated Factors: A Cross-Sectional Survey
Source: MDPI journal article supplement (doi:10.3390/healthcare11162321), 2023-08-17
Supplement: s1 [file s1]

**Additional File S1: Expectations with Antenatal Care Items Scores Mean, Standard deviation and Median**

| <b>Expectations Scale</b>                                                                                       | <b>Mean</b> | <b>SD</b> | <b>Median</b> | <b>Subscale</b>     |
|-----------------------------------------------------------------------------------------------------------------|-------------|-----------|---------------|---------------------|
| I expected to be seen sooner for my first prenatal visit                                                        | 4.77        | 1.762     | 6             | Complete Care       |
| I expected to have my prenatal visits take a long time                                                          | 2.88        | 1.887     | 2             |                     |
| I expected to get more from my prenatal visits than being weighed and having my baby's heart checked            | 4.62        | 1.876     | 6             |                     |
| I expected to receive information during my visits without having to ask so many questions                      | 2.30        | 1.742     | 2             |                     |
| I expected to have one provider (=gynaecologist, midwife or doctor) that I routinely see for my prenatal visits | 2.24        | 1.783     | 1             | Provider continuity |
| I expected to have the provider that I routinely see deliver my baby                                            | 2.44        | 2.013     | 1             |                     |
| I expected my provider to care how I feel mentally as well as physically                                        | 4.51        | 1.841     | 5             | Personalized Care   |
| I expected my provider to be gentle during my physical exam                                                     | 5.08        | 1.519     | 6             |                     |
| I expected someone to listen to my problems                                                                     | 4.75        | 1.750     | 6             |                     |
| I expected a referral when I tell the clinic/office staff about a problem                                       | 4.47        | 1.882     | 5             |                     |
| I expected the services of a social worker to be part of prenatal care                                          | 3.82        | 2.152     | 5             | Other services      |
| I expected the services of a nutritionist to be part of prenatal care                                           | 4.44        | 2.054     | 6             |                     |
